Mechanisms for action prediction operate differently in observers with motor experience

Lincoln J Colling

Department of Cognitive Science

Macquarie University

Department of Psychology

University of Cambridge

William F Thompson

Department of Psychology

Macquarie University

John Sutton

Department of Cognitive Science

Macquarie University

### Abstract

Recent theoretical and empirical work has suggested an important role for the motor system in generating predictions about the timing of external events. We tested the hypothesis that motor experience with an observed action changes how observers generated predictions about these actions by comparing the performance of naïve and experienced observers on a task that required participants to predict the timing of particular critical points in a ongoing observed action. Crucially, we employed action and non-action stimuli with identical temporal dynamics, and we predicted that motor experience would enhance prediction accuracy specifically for actions and would have a reduced or negligible effect on enhancing prediction accuracy for non-action stimuli. Our results showed that motor experience did modulate prediction accuracy for action stimuli relative to non-action stimuli. No difference between conditions was observed for the naïve observers.

*Keywords:* action prediction, perception–action

Mechanisms for action prediction operate differently in observers with motor experience

## Introduction

Many types of joint action require two actors to coordinate their actions in time. For example, in joint actions such as ensemble music and dance performance, successful completion of the joint action might require the actions of two people to be precisely temporally aligned, or synchronised. If people were to observe and then react to the actions of their co-actors this would introduce disruptive delays. Instead, individuals must anticipate the actions of their co-actors so that they can plan actions early. Consequently, researchers have emphasised the role of prediction in recent theoretical accounts of joint action coordination (Colling & Williamson, 2014; Csibra, 2008; Wilson & Knoblich, 2005; Knoblich, Butterfill, & Sebanz, 2011; Colling, Knoblich, & Sebanz, 2013). Furthermore, as many cases of joint action, such as music, dance, or sport performance, also involve cases of *expert* performance, researchers have also turned their attention to how these predictive processes might be modulated by motor experience (e.g., Sebanz & Shiffrar, 2009; Aglioti, Cesari, Romani, & Urgesi, 2008). It is the influence of motor experience on action prediction that is the primary concern of the present study.

## Neural mechanisms for action observation and prediction

There is a rich literature examining the influence of motor experience on neural networks that are preferentially activated during action observation (for seminal examples, see Calvo-Merino, Glaser, Grézes, Passingham, & Haggard, 2005; Calvo-Merino, Grézes, Glaser, Passingham, & Haggard, 2006; Cross, Hamilton, & Grafton, 2006). The initial work on this action observation network began with the discovery of *mirror neurons* in premotor regions of the monkey brain. Mirror neurons are active when the monkey performs an action and also when the monkey observes the same, or a similar, action performed by another (Rizzolatti, Fadiga, Gallese, and Fogassi, 1996; Gallese, Fadiga, Fogassi, and Rizzolatti, 1996; and for a recent review see Giese and Rizzolatti, 2015). The literature on mirror neurons, or more precisely, the *mirror system*, provide a rich trove of data linking various manipulations to changes in the pattern of activity in these neural systems. The seminal work of Calvo-Merino and colleagues (e.g., Calvo-Merino et al., 2005; Calvo-Merino et al., 2006) and Cross and

29 colleagues (e.g., Cross et al., 2006) are particularly relevant to the present study. To take just  
30 one example, Calvo-Merino et al. (2006) examined activity in the action observation network  
31 when dancers viewed dance moves that they either had experience performing themselves or  
32 dance moves that they did not have experience performing. This was done by showing male  
33 and female expert ballet dancers examples of dance moves that were either specific to their  
34 gender (and thus were part of their repertoire), specific to the opposite gender (which they  
35 would be visually familiar with but have no experience performing), or gender common. The  
36 results showed that neural regions that responded to observed actions were sensitive to motor  
37 familiarity, being more responsive to dance moves that fell within the observer's repertoire.  
38 While this work provides important insights into how responses in the mirror system can be  
39 changed by the observers' motor experience they don't provide much information about the  
40 functional consequences of these changes.

41 Many theories about the functional role of the mirror system have focused on how the  
42 mirror system might play a role in action recognition or action understanding (e.g., Sartori &  
43 Betti, 2015; Giese & Rizzolatti, 2015). Other accounts, however, suggest that this system  
44 might also, or even primarily, be involved in generating predictions about ongoing observed  
45 actions (e.g., Wilson and Knoblich, 2005; Csibra, 2008; Colling et al., 2013; and see Kilner,  
46 Friston, and Frith, 2007, for an account of the role of the mirror system in action prediction in  
47 the context of action understanding). Accounts linking the mirror system to action prediction  
48 have relied on the fact that the mirror system is partially co-extensive with the action control  
49 system and, therefore, observed actions might be processed by some of the same neural  
50 machinery involved in planning and executing actions. This link to planning and executing  
51 actions is important, because work on computational models of action control highlight a  
52 fundamental role for *prediction* in action control (Wolpert, 1997).

### 53 **Computational models of action control**

54 Concepts borrowed from control theory have been particularly useful for understanding  
55 how prediction, during both action observation and action control, might be achieved (for an  
56 introduction to control theory, see Golnaraghi, 2010). Specifically, *inverse models* and  
57 *forward models* have proven theoretically useful. Inverse models perform an *inverse mapping*

58 from an output or goal state to the sequence of control commands necessary to produce that  
59 output. And forward models perform a *forward mapping* from the control commands to the  
60 output. That is, they model the dynamics of the system being controlled.

61 Inverse and forward models—together known as *internal models*—have a central role in  
62 theoretical accounts of action control (for example, see Wolpert, Miall, & Kawato, 1998).  
63 Inverse models act as controllers that transform a desired limb trajectory into the motor  
64 commands that would produce that trajectory. And forward models replicate the dynamics of  
65 the limb and can, therefore, be used to predict how the limb will respond to motor commands  
66 (Wolpert & Kawato, 1998). Running the forward model *offline*—that is, without producing  
67 any actual motor output—can be used to internally simulate limb movements. Grush (1997;  
68 2004) refers to this process as *emulation* and to the forward model as an *emulator*.

### 69 **Predicting observed actions**

70 Grush's (1997; 2004) ideas about emulation have been developed into an account of  
71 action prediction that has been termed the *emulator theory of action prediction* (Colling &  
72 Williamson, 2014; Colling, Thompson, & Sutton, 2014). While many slightly varying  
73 formulations exist (see also Colling et al., 2013; Csibra, 2008; Keller, 2012; Wilson &  
74 Knoblich, 2005; Wolpert, Doya, & Kawato, 2003; Vesper, Butterfill, Knoblich, & Sebanz,  
75 2010), the basic idea is that prediction of observed actions relies on the same internal  
76 mechanisms that support action production. The basic claim is that the observer's action  
77 control system acts as an emulator enabling the observed action to be internally simulated in  
78 real-time. These real-time simulations can then be used as the basis for anticipatory action  
79 planning. However, in order to internally simulate the observed action using an emulator, a  
80 motor command, which ordinarily drives the forward model during action production, is  
81 needed. One way to generate this motor command might be to formulate a conjecture about  
82 what action the observed agent is producing (Kilner et al., 2007) or by visual analysis of the  
83 observed action (Csibra, 2008). Visual analysis can be coupled with an inverse model to  
84 simulate the motor commands driving the observed action.

85 **Prediction and motor experience.** A key claim of the emulator theory of action  
86 prediction, at least as formulated by Wilson and Knoblich (2005) and Colling and colleagues

87 (Colling et al., 2013; Colling & Williamson, 2014), is that the observed action is mapped onto  
88 the observer's body in a part-by-part manner. That is, prediction occurs by internally  
89 simulating the action *as if the observer was performing it*. Because prediction is tied to the  
90 observer's own action control system, predictions should carry traces of this system.

91 One way to test this claim is to compare action prediction in experts and novices<sup>1</sup>. For  
92 example, Aglioti et al. (2008) employed a basketball free throw prediction task to compare the  
93 performance of novice and expert basketball players. The general finding from these  
94 paradigms is that experts generate more accurate predictions than novices (Abernethy, 1990;  
95 Isaacs & Finch, 1983; Aglioti et al., 2008; Sebanz & Shiffrar, 2009). Although studies  
96 comparing action prediction in experts and novices appear to demonstrate that predictive  
97 processes are enhanced by motor experience at least one concern can be raised. Specifically,  
98 the causal relationship between expertise and prediction is not clear. It may be the case that  
99 expertise causes superior predictive abilities; however, it is also possible that those who  
100 become experts do so because they already possess superior predictive abilities. To uncover  
101 the direction of causality it may be preferable to train people on an action rather than use  
102 experts. This approach was adopted by Casile and Giese (2006). However, this study only  
103 examined whether motor training led to enhanced performance on a visual action  
104 discrimination task, and it did not examine the question of action prediction.

105 In addition to concerns about the direction of causality, a second concern can also be  
106 raised about previous studies. In previous work by, for example, Aglioti et al. (2008), Sebanz  
107 and Shiffrar (2009), Ikegami and Ganesh (2014), Mulligan and Hodges (2013), and others<sup>2</sup>,  
108 participants were asked to generate a prediction about the outcome of an action. For example,  
109 whether a basketball free-throw would be successful or not. While these tasks do test  
110 predictive mechanisms, it is not clear whether they test the same predictive mechanisms that  
111 underlie joint performance in music, dance, and sport. The predictive mechanisms that  
112 underlie joint action must have two features, neither of which are tested by these kinds of

---

<sup>1</sup>Related to these studies are those that examine expertise-related changes in motor cortex activity during action observation tasks (e.g., see Calvo-Merino et al., 2005; Calvo-Merino et al., 2006). While the results of these studies are consistent with the emulator hypothesis, they do not provide a test of the theory because they do not involve prediction tasks.

<sup>2</sup>For neuroimaging studies that involve outcome prediction see, for example, Abreu et al. (2012) and Diersch et al. (2013).

113 tasks. First, predictions must be generated rapidly and in real-time and, second, it must be  
114 possible to use these predictions as the basis for anticipatory action planning. This second  
115 concern is highlighted by recent work from Mann, Abernethy, and Farrow (2010). In this  
116 study, participants were required to generate a prediction about an action and then report their  
117 prediction in different ways. This could either be by verbal report or by producing the  
118 appropriate action in response to the prediction (in this case, performing the correct cricket  
119 shot in response to the predicted trajectory of a ball delivered by a bowler). The results  
120 showed that the accuracy of predictions was modulated by response modality, suggesting that  
121 predictions generated for verbal report and action planning might reside in different  
122 (sub)systems. Therefore, in order to examine the action prediction mechanisms that might  
123 underlie joint action, it is necessary to employ tasks that replicate (at least some) of the  
124 coordination demands found in joint action. One example of this can be found in temporal  
125 alignment tasks.

126 **Temporal alignment tasks.** Temporal alignment tasks are tasks requiring observers to  
127 perform an action on the basis of their prediction, rather than make a decision. Performing an  
128 action on the basis of a prediction is indeed the response modality chosen by Cross, Stadler,  
129 Parkinson, Schütz-Bosbach, and Prinz (2013). In this study, participants were asked to  
130 generate a prediction about when a gymnast or a toy, which was moving across the screen,  
131 would reappear after moving behind an occluder. Participants were required to press a button  
132 at the point in time that they believed the person or toy would reappear. The primary finding  
133 of this study was that repeated visual exposure to the stimuli resulted in more accurate  
134 predictions about when the gymnast or toy would reappear. Importantly, however, it is not  
135 clear whether this task actually taps into action prediction mechanisms. Rather, this task could  
136 be performed using mechanisms that allow people to judge the duration of intervals. As the  
137 gymnast or toy moves across the screen, accurate perception of how long it takes to move a  
138 fixed distance would allow the observer to accurately predict when it will reappear from  
139 behind the occluder.

140 A different task, developed by Colling et al. (2014)<sup>3</sup>, was designed to tap into

---

<sup>3</sup>See Keller, Knoblich, and Repp (2007) and Flach, Knoblich, and Prinz (2003) for similar tasks.

141 mechanisms specifically related to action prediction, and to test the claim of the emulator  
142 hypothesis that traces of the observer's action control system should be evident in the  
143 predictions that they generate. In this temporal alignment task, participants viewed  
144 mannequins performing up-and-down arm movements while attempting to align a button press  
145 with the apex of each upward movement (when it changed from upward to downward).  
146 Importantly, the spacing between the points of direction change was irregular thus preventing  
147 the observer from relying on interval timing mechanisms (see Colling et al., 2014, Experiment  
148 2–3). Mannequins were viewed under two conditions. In the *self* condition, participants  
149 viewed mannequins created from motion capture recordings of their own movements  
150 produced at an earlier time. In the *other* condition, participants viewed mannequins created  
151 from recordings of another person's movements. The logic of this manipulation was that if  
152 people generate predictions using their own action control system, with forward models that  
153 replicate their own action dynamics, then predictions in the self condition should be more  
154 accurate, because in the self condition the dynamics of the predictor and the dynamics of the  
155 predicted action are matched.

156 The results confirmed this and people were significantly more accurate at aligning  
157 button press responses with recordings of their own actions. Importantly, these tasks require  
158 participants to not only generate predictions quickly and in real-time but also to plan and  
159 execute actions on the basis of these predictions. By employing a paradigm such as this, it  
160 should be possible to examine the influence of motor experience on prediction in tasks that  
161 more closely match the coordination demands found in joint action.

## 162 **How does motor experience modify action prediction?**

163 While we have highlighted some concerns about the previous literature, there is a more  
164 fundamental concern about this work that motivates the present study. The studies cited above  
165 (e.g., Aglioti et al., 2008) suggest that motor experience enables more accurate predictions (at  
166 least for action outcome tasks); however, these studies do not answer the question of *how* the  
167 prediction process changes in order to achieve this. For instance, it might just be that experts  
168 and novices employ the same strategy<sup>4</sup> or mechanisms and that experts are just able to

---

<sup>4</sup>The word *strategy* is not meant to imply a high-level cognitive function or something that is conscious or deliberative.



169 employ this strategy with greater efficiency or accuracy. However, it might also be the case  
170 that novices and experts employ distinct mechanisms, or use distinct strategies, with the  
171 consequence of this being superior prediction accuracy for the experts. The suggestion that  
172 distinct processes or strategies might underlie action prediction in experienced and naïve  
173 observers is found in an extension of the emulator hypothesis, developed by Schubotz (2007).  
174 Based on results from fMRI (e.g., Schubotz & von Cramon, 2004) and lesion studies (e.g.,  
175 Schubotz, Sakreida, Tittgemeyer, & von Cramon, 2004), which implicate premotor regions in  
176 sequence prediction, Schubotz (2007) suggests that motor simulation is a general purpose  
177 predictive mechanism for predicting not only human actions but all manner of external events.  
178 In the case of *reproducible events* (e.g., human actions) it is possible to internally simulate the  
179 observed action using the same mechanisms used to produced them, as claimed by the  
180 emulator theory (e.g., see Colling et al., 2013; Wilson & Knoblich, 2005; Colling &  
181 Williamson, 2014). In the terminology of Schubotz (2007, p. 213), observers use their “motor  
182 memories to run a simulation of the observed movement”. In the absence of these motor  
183 memories, Schubotz (2007) suggests that predictions might be generated by mapping the  
184 observed event onto an effector that best matches the general dynamics of the observed  
185 stimuli. This suggests that experienced and naïve observers might actually engage different  
186 mechanisms or employ distinct strategies during action prediction, with experienced observers  
187 internally replicating the observed action *as it was performed* and naïve observers just  
188 replicating the stimulus dynamics with whatever effector does the best job. This generic  
189 simulation (as opposed to *action specific* simulation) might not only occur in the absence of  
190 motor experience. It might also occur when the observed stimuli cannot be easily mapped onto  
191 the observer’s body. For example, when the action stimuli are impoverished so that it is not  
192 clear *how* the action is being produced—that is, when the observed actions are not amenable to  
193 visual analysis (Csibra, 2008)—it might not be clear which action, out of all possible actions,  
194 to internally simulate. In this case, observers might again internally replicate the dynamics of  
195 the stimulus using whatever effector does the best job rather than simulating the actual action.

196 **Aims of the present study**

197 The aim of the present study is to investigate *how* predictive processes change when  
198 observers have experience producing observed actions. Previous studies have reported that  
199 action prediction becomes more accurate when observers possess motor experience; however,  
200 it is not clear how the process changes to enable this. Indeed, measuring prediction accuracy  
201 alone may not be sufficient to do this. Furthermore, previous studies on action prediction have  
202 generally tended to focus on predicting action outcomes, with relatively few studies (e.g.,  
203 Colling et al., 2014; Keller et al., 2007; Flach et al., 2003) employing the kind of tasks that  
204 replicate the temporal demands found in joint action.

205 The work of Schubotz (2007) suggests that experienced and naïve observers employ  
206 distinct mechanisms for action prediction. It might be possible to test whether experienced  
207 and naïve observers engage distinct predictive mechanisms, or employ different predictive  
208 strategies, by designing a manipulation that should effect only one strategy and not the other.  
209 Schubotz (2007) suggests that generic, non-action specific, simulation should occur not only  
210 when observers have little or no experience producing the observed action, but it should also  
211 occur when the stimulus is impoverished, so that it cannot easily be mapped on to the body in  
212 a part-by-part manner or when the stimulus does not clearly depict an action. Therefore, we  
213 can expect these two factors—the motor experience of the observer and the nature of the  
214 stimulus—to interact. That is, if an observer is engaged in generic, or approximate, simulation  
215 of the observed action, such as when they have no experience producing the action, then  
216 diminishing stimulus detail, so that the stimulus cannot be mapped onto the body, should be of  
217 little consequence, because generic simulation does not require the stimulus to be mapped  
218 onto the body. However, if the observer is engaged in a detailed part-by-part simulation then  
219 decreasing the stimulus detail, so that it is not clear how the action is being produced, should  
220 interfere with the predictive process. That is, changing the nature of the stimulus, so that  
221 action specific but not the critical dynamic information is reduced, should only have an effect  
222 on experienced observers.

223 To test this hypothesis, we examined the influence of motor experience on prediction  
224 during a temporal alignment task similar to that used by Colling et al. (2014). Two groups of

225 participants, those with experience producing the observed action and naïve participants,  
226 viewed actions under two conditions. In the full information condition, the stimuli depicted  
227 the actions in full, including information about the arrangement of the limbs and joints during  
228 the production of the action. In the point information condition, participants were required to  
229 align a response with the same dynamic information; however, the displays were impoverished  
230 so that they did not depict an action. We predict that naïve observers, who only engage an  
231 approximate, rather than an action specific, predictive solution, which replicates the dynamic  
232 information of the stimulus but without internally replicating the action itself, should display  
233 little, or no, difference between the two conditions. In experienced observers, however,  
234 decreasing stimulus information should hamper the process of internal replication. This  
235 should result in a difference in prediction accuracy between stimulus conditions as a function  
236 of motor experience—that is stimulus condition and motor experience should interact. Using  
237 this procedure has an advantage over simply comparing prediction accuracy for a single  
238 stimulus type (e.g., as typically done in studies of sports expertise such as, for example,  
239 Aglioti et al., 2008) because the stimulus manipulation is predicted to have a different effect  
240 on alignment accuracy depending on the strategy employed by the observer. Thus it may be  
241 possible to examine whether the naïve and experienced group employ distinct strategies.  
242 Typical sports expertise studies are blind to whether experts employ a different, more accurate,  
243 strategy relative to novices or whether experts just employ the same strategy as novices but  
244 with greater precision. It is important to note here that, unlike previous studies, our prediction  
245 is not that experienced observers will be more accurate. Indeed, we are agnostic about whether  
246 experienced or naïve observers will be more accurate. We only aim to test whether naïve and  
247 experienced observers rely on distinct strategies, and our stimulus manipulation is designed to  
248 influence one strategy and not the other. Therefore, the key comparison is whether the effect  
249 of stimulus is different between the two groups (that is, whether group and stimulus interact).  
250 It may be the case the the experienced observers' strategy will be more accurate—for  
251 example, as shown in previous work. However, it does not follow from this work that this will  
252 necessarily be the case. This is because whether a one strategy or another is more successful,

253 less successful or equally successful is dependent on the context in which they are employed <sup>5</sup>.

254

## Methods

### 255 Participants

256 There were 13 participants (11 females, mean age of 27.5 years) in the experienced  
257 group, and 12 participants (8 females, mean age of 20.1 years) in the naïve group. All  
258 participants were right-handed (Oldfield, 1971), and all procedures were approved by the  
259 Macquarie University Human Subjects Ethics committee.

### 260 Stimuli

261 To create the stimuli for the test session, five right-handed females (mean age of 24.8  
262 years) performed a movement task while their movements were recorded with motion capture.  
263 The movement task involved tracing out wave and zigzag patterns as if drawing them on a  
264 blackboard (the patterns measured 0.584 m × 0.841 m; see Figure 1). Each pattern contained  
265 five peaks, alternating in height from large to small; however, they differed in the nature of the  
266 direction change at the apex of the peaks. The zigzag pattern contained an abrupt change  
267 while the wave pattern had a smooth direction change. We had no predictions about how  
268 pattern would influence performance; therefore, the data were collapsed over pattern during  
269 data analysis.

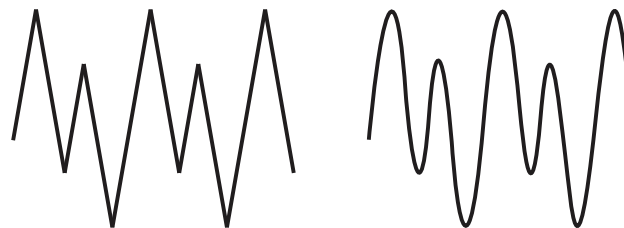

*Figure 1.* The zigzag (left) and wave (right) patterns used as stimuli during the movement task

270 Movements were recorded using an 8-camera 3-D passive optical motion capture system  
271 (Vicon MX with 4 MX-F20 and 4 MX13+ cameras; 200 Hz sampling rate). To define the limb

<sup>5</sup>If this claim seems initially implausible consider the, admittedly extreme, example in which somebody could employ two strategies to catch a ball. The expert strategy involves moving just so and so in response to the movement of the ball and anticipating the flight of the ball. The dumb strategy involves simply placing ones hand in a particular spot. In a context where the ball, with a high degree of regularity, can be expected to land in a specific spot, the dumb strategy will be just as good as, and possibly even better than, the expert strategy. However, in a context with more variability, only the expert strategy will be successful. Therefore, paradigms that rely solely on gross accuracy or success differences between groups cannot fully answer the question of how action prediction is modulated by experience.

272 segments, and the position of the torso, markers were placed on the shoulders, the right elbow,  
273 wrist, waist, and the top of the right hand (See Figure 2). For the full information condition,  
274 the motion capture data was rendered as an animated character consisting of an upper torso,  
275 right arm and right hand. For the point information condition, only a single point tracking the  
276 movement of the RFIN marker was displayed (See Figure 3). Mannequins were preferred over  
277 point-light displays because they preserve occlusion.

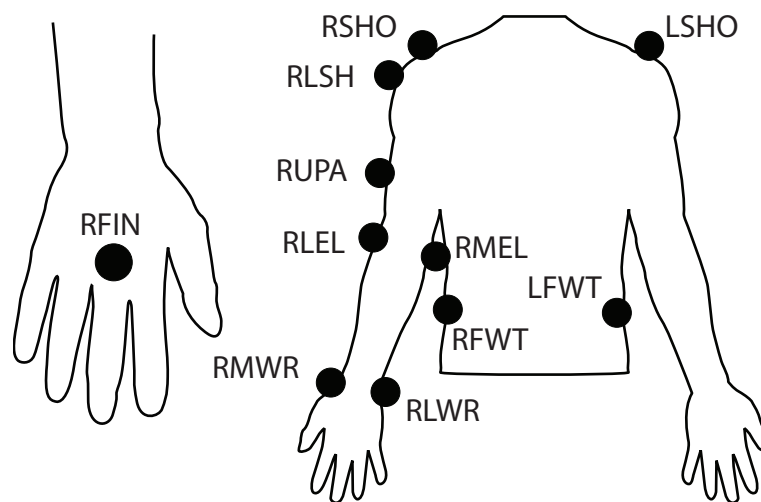

Figure 2. Marker positions for the 11 reflective markers used during the movement task

## 278 Procedure

279 Participants in the experienced group undertook a movement session that was identical  
280 to the task employed during stimulus creation. Participants performed 3 blocks containing 5  
281 repetitions of each pattern (in random order) with their eyes closed to limit visual experience.  
282 The movement session and the test session were on average separated by 16.69 days (7 to 28  
283 days).

284 The task in the test session, which was conducted in a different lab to the movement  
285 task, was to press the response button when the hand of the mannequin, or the marker tracking  
286 the hand, reached the apex of each upward movement. That is, on each trial participants were  
287 required to press the button *five* times. They were instructed to synchronise the button-press  
288 with the display as accurately as possible and were told that this may require them to  
289 anticipate when the peak will occur. Each participant performed 4 blocks containing 40 unique  
290 stimuli (composed of 20 trials for the full information condition and 20 trials for the point

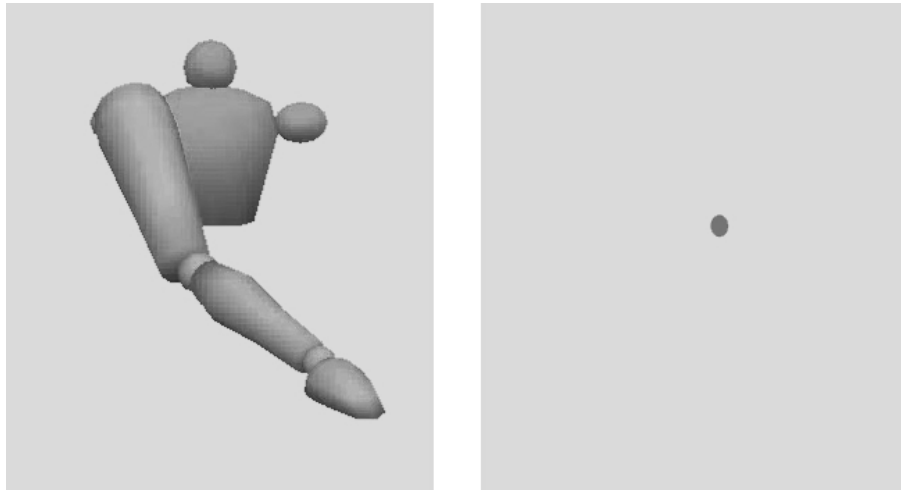

*Figure 3.* Example stimuli from the full information condition (left) and the point information condition (right)

291 information condition) with equal numbers of wave and zigzag stimuli. Participants that did  
292 not undergo the movement session were given a brief verbal description of the movement task.

### 293 **Statistical analyses**

294 To measure alignment accuracy, we calculated the absolute timing difference between  
295 the occurrence of the peak in the motion capture trajectory and the occurrence of the button  
296 presses performed by the participant. Only the last four button presses were analysed because  
297 several stimuli contained missing frames leading up to the first peak. Absolute timing error  
298 was analysed by means of a  $2 \times 2$  mixed ANOVA with the factors stimulus condition (full  
299 information, point information) and group (experienced, naïve). The primary comparison of  
300 interest was the interaction term— that is, whether the difference between the stimulus  
301 conditions was different between the two groups. Therefore, we report the effect size in the  
302 form of Hedges  $g$  (with bootstrapped confidence intervals), because our predictions, and thus  
303 our interpretation of the data, are focused on the magnitude of the difference between the  
304 groups and conditions. Conventional interpretations of the Hedges  $g$ , a unbiased estimate of  
305 Cohens  $d$ , places the boundaries for small, medium, large effects at 0.2, 0.5, and 0.8 (Cohen,  
306 1969).

307 In addition to the standard null hypothesis significant tests, we also include confidence  
308 intervals, as recommended by Cumming (2013). Furthermore, we provide bayesian parameter  
309 estimates for all the comparisons reported in the primary analysis. We adopt the approach

310 outlined by Kruschke (2013), which involves fitting a  $t$ -distribution to the data by estimating  
311 the three parameters of the  $t$ -distribution: a mean ( $\mu$ ), a standard deviation ( $\sigma$ ), and a shape  
312 parameter ( $\nu$ )—the addition of the shape parameter ( $\nu$ ) allows the model to account for  
313 outliers in the data<sup>6</sup>. We report the 95% highest density intervals (HDI) for the parameter  $\mu$ , as  
314 well as the 95% HDI for the effect size estimates, designated as  $d$ , which are calculated as  $\mu/\sigma$   
315 for the one sample comparisons and as  $(\mu_1 - \mu_2)/(\sqrt{(\sigma_1^2 N_1 - 1 + \sigma_2^2 N_2 - 1)/(N_1 + N_2 - 2)})$   
316 for two sample comparisons. These effect sizes can be interpreted using the same conventions  
317 as for Hedges  $g$ .

318 In an exploratory follow-up analysis, we report the effect size  $\eta_G^2$ , which provides a  
319 measure of the proportion of variance in the measured variable that is explained by the level of  
320 the factor (see Olejnik & Algina, 2003). The boundaries for small, medium, and large effects  
321 are usually placed at 0.01, 0.06, 0.14 (Cohen, 1969)<sup>7</sup>. For violations of sphericity we report  
322 Greenhouse-Geisser  $\epsilon$ , uncorrected  $dfs$ , and corrected  $ps$ .

## 323 Results

324 The results showed that there were no systematic differences in alignment accuracy  
325 between the experienced group ( $M = 126.42$ ,  $SD = 48.40$ ) and the naïve group ( $M = 114.46$ ,  
326  $SD = 33.22$ ),  $F_{1,23} = 0.51$ ,  $p = .482$ , Hedges  $g = 0.28$ , 95% CI [-0.52, 1.02],  $M_D = 11.11$ , 95%  
327 HDI [-26.45, 49.89],  $d = 0.26$ , 95% HDI [-0.56, 1.06]. The group main effect, and 95%  
328 confidence intervals, are shown in Figure 4A.

329 Furthermore, there were no systematic differences in the alignment accuracy between  
330 the point information condition ( $M = 121.84$ ,  $SD = 40.83$ ) and the full information condition  
331 ( $M = 119.52$ ,  $SD = 42.44$ ),  $F_{1,23} = 1.867$ ,  $p = .185$ , Hedges  $g = 0.25$ , 95% CI [-0.11, 0.63],  
332  $M_D = 2.19$ , 95% HDI [-1.54, 5.98],  $d = 0.25$ , 95% HDI [-0.16, 0.67]. The condition main  
333 effect, and 95% confidence intervals, are shown in Figure 4B.

334 Our primary comparison of interest was whether the effect of stimulus condition was  
335 modulated by group. This is examined by the interaction in the ANOVA, which compares the  
336 difference in alignment accuracy between the Point information and the Full information

<sup>6</sup>For more details on the prior distributions for each parameter, see Kruschke (2013).

<sup>7</sup>Note, however, that Cohen (1969) provides definitions for small, medium, and large effects in terms of  $f$ . Here we have converted from  $f$  to the equivalent values of  $\eta_G^2$ .

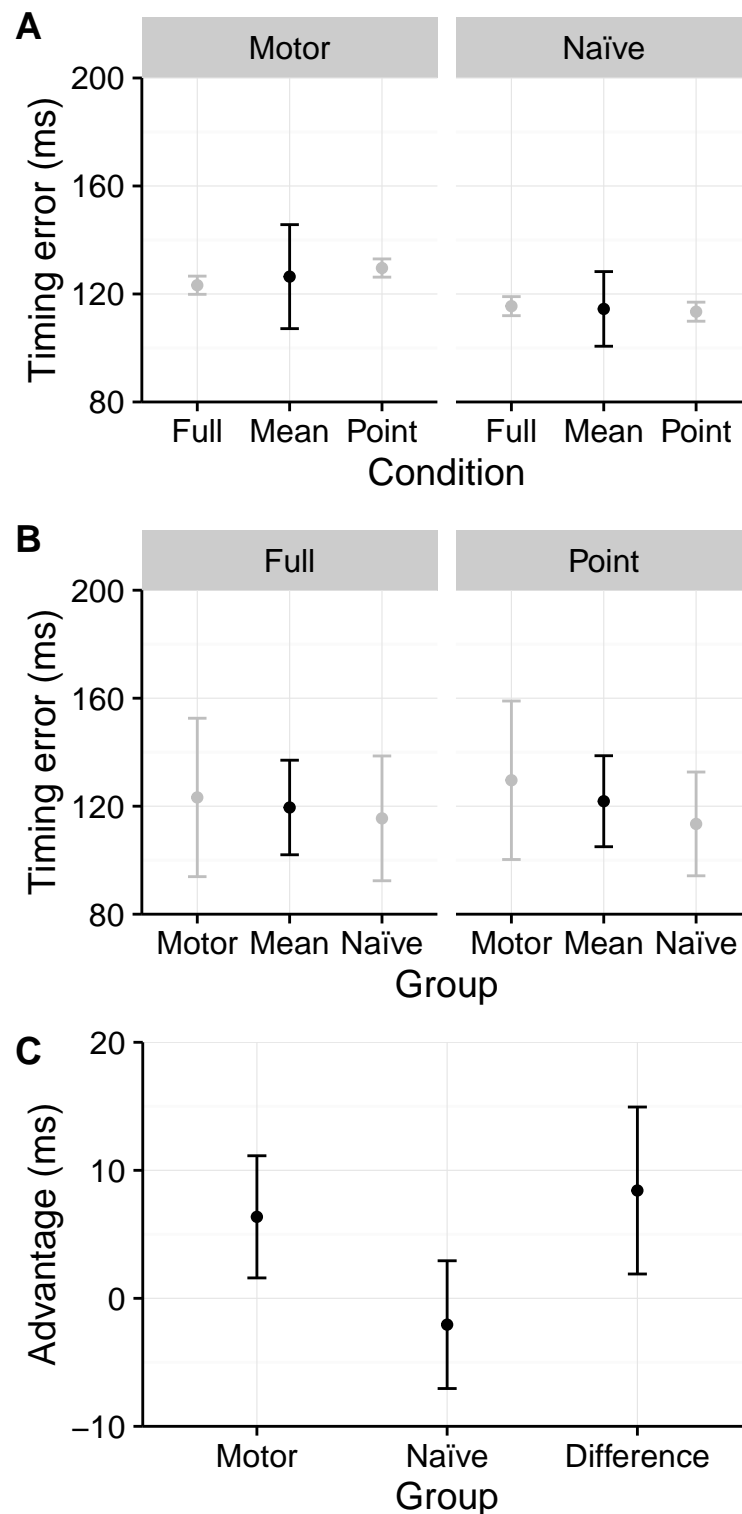

Figure 4. (A) Plot of the Group main effect. Black bars show the two group means and 95% confidence interval, while the grey bars show the cell means and the within-subject confidence intervals. (B) Plot of the Condition main effect. Black bars show the two condition means and the 95% confidence intervals, while the grey bars show the cell means and the between subject confidence intervals. (C) Plot of the Group × Condition interaction, showing the full information advantage for each group together with the difference between the two groups.



337 condition in the experienced group with this difference in the naïve group. This difference,  
338 which we term the *full information advantage* was larger in the experienced group ( $M = 6.15$ ,  
339 95% HDI [1.22, 11.28],  $d = 0.77$ , 95% HDI [0.12, 1.44]) than in the naïve group ( $M = -2.26$ ,  
340 95% HDI [-7.58, 3.18],  $d = -0.28$ , 95% HDI [-0.91, 0.36]),  $F_{1,23} = 7.135$ ,  $p = .014$ , Hedges  $g =$   
341 1.03, 95% CI [0.22, 1.87],  $M_D = 8.41$ , 95% HDI [1.24, 15.76],  $d = 0.94$ , 95% HDI [0.09,  
342 1.88]. This interaction is shown in Figure 4C.

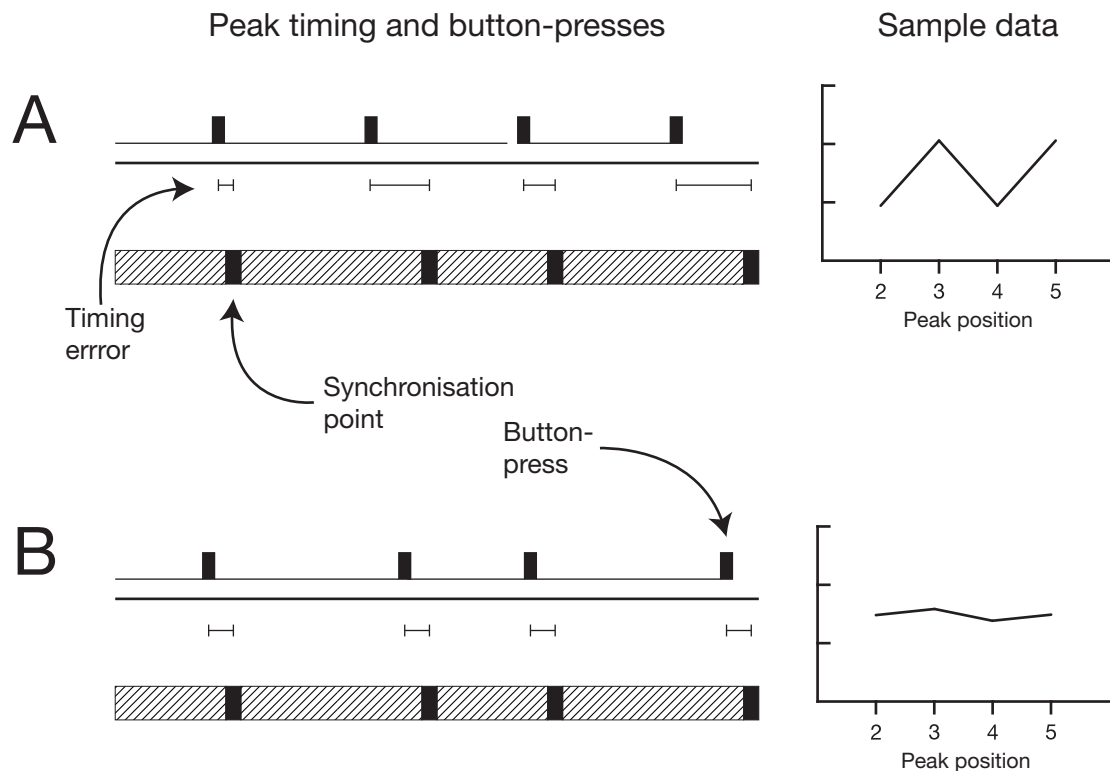

Figure 5. (A) Evenly spaced button-presses results in timing errors that vary as a function of peak number. (B) Button presses that vary according to peak position results in timing errors that do not vary according to peak position

### 343 Exploratory analysis of group differences

344 A further attempt was made to explore differences in task performance between the  
345 experienced and naïve group. To do this, we examined whether there were any differences in  
346 task performance related to whether participants primarily responded to the local or the global  
347 dynamics of the stimulus. In the stimulus, the duration of each upward movement alternated  
348 from long to short leading to local variations in the timing of the peaks. That is, the timing of  
349 the peaks was not evenly spaced across the trial with peaks being separated by alternating long  
350 and short gaps. If participants based their responses on the global dynamics of the

351 stimulus—for example, the average inter-peak interval—and produced evenly spaced button  
352 presses that matched these global dynamics then the magnitude of the timing error would  
353 fluctuate from peak to peak. That is, if participants just tapped at a regular isochronous rhythm  
354 then timing error would vary as a function of peak position because the stimulus itself is not  
355 isochronous. If, on the other hand, participants adjusted their responses according to the local  
356 variations in the stimulus—that is, the local peak to peak timing variations—then timing error  
357 should be relatively constant across the trial. (The logic of this analysis is shown in Figure 5).

358 In order to examine which of the two strategies was adopted by each of the groups, we  
359 analysed timing error as a function of peak position using two separate one-way ANOVAs. If  
360 participants adopted the strategy of responding to the global dynamics of the stimulus, then  
361 this should be evident as a significant effect of peak position on timing error. However, if  
362 participants adopted the strategy of responding to the local dynamics of the stimulus then we  
363 should not find a significant effect of peak position of timing error. The results of the analysis  
364 showed a significant effect of peak position on timing error for the naïve group,  $F_{3,33} =$   
365  $11.148$ ,  $p = .005$ ,  $\eta_G^2 = 0.216$ ,  $\epsilon = 0.369$ , but not for the experienced group,  $F_{3,36} = 2.745$ ,  $p =$   
366  $.117$ ,  $\eta_G^2 = 0.036$ ,  $\epsilon = 0.386$ . This is consistent with the experienced group and the naïve group  
367 adopting different strategies, with the naïve group responding to the global dynamics of the  
368 stimulus and the experienced group responding to the local dynamics. These data are shown in  
369 Figure 6.

## 370 Discussion

371 The primary aim of the present study was to investigate how online prediction of action  
372 is changed by motor experience. Previous studies have shown that observers who have  
373 experience performing an action are able to generate more accurate predictions about that  
374 action (e.g., Aglioti et al., 2008; Sebanz & Shiffrar, 2009). This increase in prediction  
375 accuracy could be achieved in at least two ways. It might be that increased accuracy is  
376 achieved through motor experience fine-tuning or otherwise enhancing the operation of a  
377 predictive mechanism that is common to both naïve and experience observers. However, it  
378 might also be the case that motor experience allows observers to engage different predictive  
379 mechanisms or apply distinct predictive strategies to the problem of action prediction,

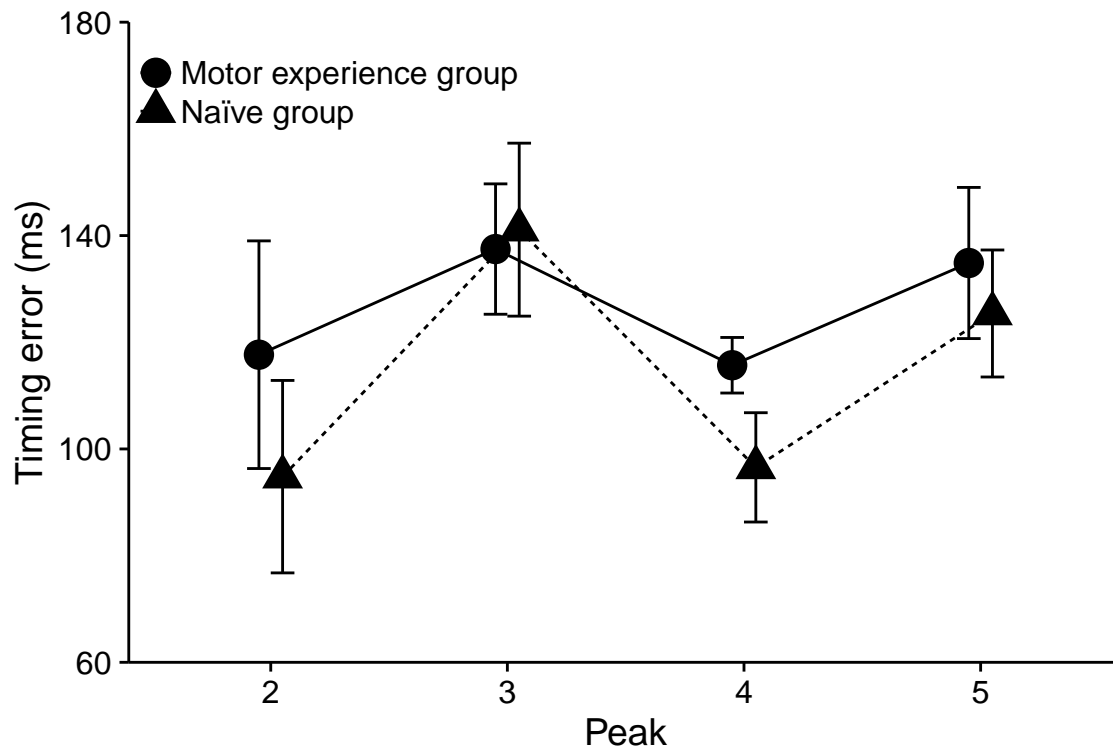

Figure 6. Timing error as a function of peak position for the experienced and naïve group. Error bars show the within-subjects 95% confidence intervals.

380 strategies or mechanisms that naïve observers are not able to call upon. By only measuring  
381 overall prediction accuracy, these studies only show *that* prediction is altered by motor  
382 experience but not *how* it is altered. Addressing this question was the aim of the present study.

383 Based on work by Schubotz (2007), we hypothesised that motor experience may allow  
384 observers to engage in a different kind of prediction to naïve observers. Specifically, we  
385 predicted that observers with motor experience would be capable of reactivating “motor  
386 memories” from previous performances, which would enable them to internally simulate the  
387 same action that was being observed. Naïve observers, on the other hand, would only be able  
388 to engage in a non-specific simulation of the stimulus dynamics using the motor dynamics of  
389 the effector that most closely replicated the dynamics of the stimulus.

390 To test this hypothesis, we compared prediction accuracy for experienced and naïve  
391 participants under two stimulus conditions, which were designed to have an differential effect  
392 depending on whether the observer performed a non-specific or action specific simulation of  
393 the observed action. In the full information condition, participants viewed stimuli that fully  
394 depicted the action being performed, including information about the limbs and joints used to

395 produce the action. In the point information condition, participants viewed stimuli that did not  
396 depict an action but did replicate the stimulus dynamics of the full information condition. The  
397 logic of this manipulation is that if observers are engaged in a non-specific simulation of the  
398 stimulus dynamics then altering the *action-related* properties of the stimulus—for example,  
399 the depiction of which effectors were used to produce the action—while holding the critical  
400 dynamic properties of the stimulus constant should have little or no effect on prediction  
401 accuracy, because the critical information—the stimulus dynamics—do not change between  
402 conditions. If, however, observers engaged in an action-specific simulation of the stimulus  
403 then changing *action-related* properties should have an effect on prediction accuracy.  
404 Therefore, by comparing the difference between the two conditions between the experienced  
405 and naïve observers it should be possible to examine whether the underlying predictive  
406 process is different between the two groups.

#### 407 **The effect of stimulus condition**

408 The results showed that overall there was no difference in alignment accuracy between  
409 the full information and the point information condition. This result may initially appear  
410 surprising. However, the stimulus manipulation was designed to only affect one prediction  
411 strategy—namely, the strategy that involves mapping the observed action onto the body and  
412 simulating the action as it was produced; therefore, this finding is consistent with our  
413 prediction that stimulus information should only increase alignment accuracy in participants  
414 with motor experience.

#### 415 **The effect of motor experience**

416 The primary aim of the present study was to examine the influence of motor experience  
417 on action prediction. Contrary to previous work by, for example, Aglioti et al. (2008) and  
418 Sebanz and Shiffrar (2009), the results of the present study did not show that motor experience  
419 results in an overall increase in prediction accuracy. This may initially appear strange or  
420 counterintuitive; however, this finding is consistent with our hypothesis that naïve and  
421 experienced observers employ different predictive strategies or engage distinct mechanisms  
422 for action prediction. This is agnostic to the question of whether one or the other predictive  
423 strategy results in superior prediction. While a null finding is difficult to interpret, it may be

424 the case that, within the context of our experiment, overall performance accuracy is no  
425 different; furthermore, if our hypothesis is correct, then our results are not in conflict with  
426 other findings that show that in other contexts, such as those examined by Aglioti et al. (2008)  
427 and Sebanz and Shiffrar (2009), motor experience results in superior prediction. Indeed, we  
428 might even expect to find that in some contexts experienced observers perform worse than  
429 naïve observers. This is because prediction accuracy alone cannot distinguish one prediction  
430 strategy from the other. This can only be done by manipulations designed to have an influence  
431 on one prediction strategy and not another, such as, for example, our stimulus manipulation.

432         Although not part of our initial hypothesis, we did conduct an exploratory secondary  
433 analysis to examine whether there was any information in the pattern of alignment accuracy  
434 data that would suggest that experienced and naïve observers were performing the task in  
435 different ways. In particular, if naïve participants generated their predictions by means of a  
436 generic, non-specific, simulation then we might expect these predictions to be less sensitive to  
437 fine-grained timing changes in the stimulus relative to the full-blown internal action  
438 replication that we hypothesised would be performed by the experienced observers.

439         To test this possibility we compared the intra-trial differences in alignment accuracy for  
440 the two groups. The results showed that for the naïve group, alignment accuracy differed  
441 significantly as a function of peak position. This was not the case for the experienced group.  
442 This result could be produced by naïve participants merely responding to the global dynamics  
443 of the stimulus instead of responding to the fine-grained timing variations in the stimulus, as  
444 seen in the experienced participants. This result is consistent with the notion that experienced  
445 observers generate predictions about observed actions by employing an internal model of that  
446 action that is acquired through motor experience. By mapping the observed action onto their  
447 internal model for that action they are better able to capture the fine-grained timing variations  
448 in the stimulus because their predictive model more completely captures the constraints  
449 specific to the effectors used to produce the action. If naïve observers do not internally  
450 simulate the observed action then this generic model may be less capable of capturing these  
451 fine-grained details while still being able to capture the global dynamics.

452         Recent work using transcranial magnetic stimulation may also be relevant to the current

453 work. Agosta, Battelli, and Casile (2016) examined cortico-spinal excitability during  
454 observation of action and non-action motion stimuli. While Agosta et al. (2016) found no  
455 difference in overall motor evoked potential (MEP) amplitude between the action and the  
456 non-action condition, with mean MEP amplitude only being sensitive to stimulus kinematics  
457 rather than stimulus form, differences in the temporal dynamics of cortico-spinal excitability  
458 were observed. In particular, it was found that the amplitude of the MEP correlated with the  
459 instantaneous velocity of the movement stimulus but not the abstract stimulus. This suggests  
460 that while non-action stimuli might, via mirror neurons, activate the motor system (consistent  
461 with the claims of Schubotz et al. (2004)), this activation might be different in nature to the  
462 activation produced by action stimuli. Indeed, Agosta et al. (2016, p. 190) suggest that  
463 “observation of abstract motion [produce] a ‘coarser’ activation of the observer’s motor  
464 system”. This “coarser” activation, which less accurately tracks the fine-grained dynamics of  
465 the stimulus, might underlie the difference in prediction accuracy between the full information  
466 stimuli and point information stimuli reported in the present work. However, since Agosta  
467 et al. (2016) did not examine action prediction all that can be said is that their finding is  
468 consistent with the claims advanced here and not that they support our claims. An interesting  
469 avenue for future work, which may allow a further bridge to be built between the mirror  
470 neuron system and action prediction literatures, would be to examine how the difference in the  
471 temporal dynamics of MEPs (reported by Agosta et al., 2016) are modulated by motor  
472 experience, perhaps using a task similar to the present or on an outcome prediction task such  
473 as that used by Aglioti et al. (2008).

#### 474 **Motor experience modulates stimulus effects**

475 The key to testing our hypothesis that experienced and naïve observers engage distinct  
476 predictive mechanisms was our examination of how motor experience modulated the effect of  
477 stimulus condition. This is because our stimulus manipulation was designed to only have an  
478 influence on one predictive strategy—mapping the observed stimulus onto the body—and not  
479 the other—simulating the observed action by non-action-specific means. We hypothesised that  
480 motor experience would allow participants to engage in a different type of action prediction  
481 compared with naïve participants. In particular, we hypothesised that experienced participants

482 would be able to activate an internal representation of the observed action that had been laid  
483 down by earlier performance of the action while naïve participants would just engage general  
484 purpose predictive mechanisms that are not specific to the action. This difference in the nature  
485 of prediction between the two groups should result in differences in how the two groups  
486 respond under the two stimulus conditions. For the experienced group, the full information  
487 condition should allow observers to more accurately select the correct internal action  
488 representation that corresponds to the observed action and this should result in an  
489 enhancement in alignment accuracy relative to the case where this information is absent. In  
490 the naïve group, however, the observers do not activate an internal representation of the  
491 observed action and, therefore, the addition of information that helps select the appropriate  
492 internal action representation should be of no benefit. As hypothesised, we found that  
493 alignment accuracy was enhanced in response to the full information stimuli only for  
494 participants who had experience producing the observed action.

#### 495 **Two mechanisms for action prediction in experience and naïve observers**

496 While previous studies have been able to demonstrate *that* motor experience changes  
497 processes involved in action prediction by, for example, enhancing prediction accuracy  
498 (Aglioti et al., 2008), the results presented here go further to demonstrate *how* these predictive  
499 processes are changed. Specifically, these results are consistent with the idea that experienced  
500 and naïve participants rely on different mechanisms or strategies for action prediction. This  
501 distinction between internally replicating the action itself and merely simulating the stimulus  
502 dynamics within the motor system is similar to the distinction between *emulation* and  
503 *simulation*, respectively, put forward by Grush (2004). By internally replicating the action  
504 itself, observers might not only (in certain circumstances) generate more accurate predictions  
505 but may also generate predictions that more accurately replicate the fine-grained timing details  
506 of the observed action. These differences in fine-grained details may not appear in tests of  
507 gross performance, such as predicting binary action outcomes (e.g., Aglioti et al., 2008;  
508 Sebanz & Shiffrar, 2009).

509 The findings of the present study are also consistent with recent TMS work by  
510 Novembre, Ticini, Schütz-Bosbach, and Keller (2014) and Hadley, Novembre, Keller, and



511 Pickering (2015). Both these studies involved applying TMS over motor regions while  
512 participants' were engaged in temporal coordination with stimuli that they either did or did not  
513 have experience with. For example, Novembre et al. (2014) had pianists play a duet along  
514 with a recording of a piece that they had also be trained to perform or with a untrained piece.  
515 The results showed the TMS was able to disrupt temporal coordination only when participants  
516 were playing along with a piece on which they had been trained. Similarly, in a musical  
517 turn-taking task, Hadley et al. (2015) found that TMS was able to disrupt the temporal  
518 precision of the participants' entry into a joint performance only in trained but not untrained  
519 contexts. Taken together, these studies, as well as the results of the present study, show that  
520 temporal coordination with unfamiliar stimuli relies on different mechanisms or brain  
521 networks compared with temporal coordination with familiar stimuli.

## 522 **Conclusions**

523 Taken together, the results presented here suggest that observers with and without  
524 experience performing an action rely on different mechanisms or strategies when asked to  
525 generate predictions about that action. Observers who have experience actually performing  
526 the observed action generate predictions by internally replicating the actual observed action,  
527 possibly through reactivating motor representations laid down by earlier performance.  
528 Observers without this experience, however, engage general purpose predictive mechanisms  
529 that do not necessarily replicate the actual action nor the fine-grained details of the observed  
530 action. Furthermore, when stimulus dynamics are held constant, only experienced observers  
531 are able to take advantage of action-related information (information about the limbs and  
532 joints used to produce the action) while this action-related information has no influence on the  
533 predictions generated by naïve observers. Thus, the findings of this study show not only *that*  
534 motor experience changes action prediction but also *how* motor experience changes the  
535 operation of these predictive processes. Furthermore, the results of the present study suggest  
536 the future work examining how experience modulates action prediction should, rather than  
537 employing a single task that cannot distinguish between different strategies for action  
538 prediction, employ manipulations that specifically tap into the predictive strategy of observers  
539 so that any differences in predictive strategy between experienced and naïve observers is



540 evident.

541

### **Acknowledgements**

542 A earlier version of this work was presented at the Annual Conference of the Cognitive  
543 Science Society (2013).

544

References

545

546 Abernethy, B. (1990). Anticipation in squash: Differences in advance cue utilization between  
547 expert and novice players. *Journal of Sports Sciences*, 8, 17–34.

548 doi:10.1080/02640419008732128

549 Abreu, A. M., Macaluso, E., Azevedo, R. T., Cesari, P., Urgesi, C., & Aglioti, S. M. (20121).

550 Action anticipation beyond the action observation network: a functional magnetic

551 resonance imaging study in expert basketball players. *European Journal of*

552 *Neuroscience*, 35(10), 1646–1654. doi:10.1111/j.1460-9568.2012.08104.x

553 Aglioti, S. M., Cesari, P., Romani, M., & Urgesi, C. (2008). Action anticipation and motor

554 resonance in elite basketball players. *Nature Neuroscience*, 11(9), 1109–1116.

555 doi:10.1038/nn.2182

556 Agosta, S., Battelli, L., & Casile, A. (201615). Human movements and abstract motion

557 displays activate different processes in the observer’s motor system. *NeuroImage*, 130,

558 184–193. doi:10.1016/j.neuroimage.2016.01.066

559 Calvo-Merino, B., Glaser, D. E., Grézes, J., Passingham, R. E., & Haggard, P. (2005). Action

560 Observation and Acquired Motor Skills: An fMRI Study with Expert Dancers. *Cerebral*

561 *Cortex*, 15(8), 1243–1249. doi:10.1093/cercor/bhi007

562 Calvo-Merino, B., Grézes, J., Glaser, D., Passingham, R., & Haggard, P. (2006). Seeing or

563 Doing? Influence of Visual and Motor Familiarity in Action Observation. *Current*

564 *Biology*, 16(19), 1905–1910. doi:10.1016/j.cub.2006.07.065

565 Casile, A. & Giese, M. A. (2006). Nonvisual Motor Training Influences Biological Motion

566 Perception. *Current Biology*, 16(1), 69–74. doi:10.1016/j.cub.2005.10.071

567 Cohen, J. (1969). *Statistical power analysis for the behavioral sciences*. New York.

568 Colling, L. J., Knoblich, G., & Sebanz, N. (2013). How does “mirroring” support joint action?

569 *Cortex*, 49(10), 2964–2965. doi:10.1016/j.cortex.2013.06.006

570 Colling, L. J., Thompson, W., & Sutton, J. (201423). The effect of movement kinematics on

571 predicting the timing of observed actions. *Experimental Brain Research*, 232(4),

572 1193–1206. doi:10.1007/s00221-014-3836-x

- 573 Colling, L. J. & Williamson, K. (201425). Entrainment and motor emulation approaches to  
574 joint action: Alternatives or complementary approaches? *Frontiers in Human*  
575 *Neuroscience*, 8. doi:10.3389/fnhum.2014.00754
- 576 Cross, E. S., Hamilton, A. F. d. C., & Grafton, S. T. (20061). Building a motor simulation de  
577 novo: Observation of dance by dancers. *NeuroImage*, 31(3), 1257–1267.  
578 doi:10.1016/j.neuroimage.2006.01.033
- 579 Cross, E. S., Stadler, W., Parkinson, J., Schütz-Bosbach, S., & Prinz, W. (20131). The  
580 influence of visual training on predicting complex action sequences. *Human Brain*  
581 *Mapping*, 34(2), 467–486. doi:10.1002/hbm.21450
- 582 Csibra, G. (2008). Action mirroring and action understanding: An alternative account. In P.  
583 Haggard, Y. Rossetti, & M. Kawato (Eds.), *Sensorimotor foundations of higher*  
584 *cognition* (pp. 435–459). New York: Oxford University Press.
- 585 Cumming, G. (201312). The New Statistics Why and How. *Psychological Science*,  
586 0956797613504966. doi:10.1177/0956797613504966
- 587 Diersch, N., Mueller, K., Cross, E. S., Stadler, W., Rieger, M., & Schütz-Bosbach, S.  
588 (201321). Action Prediction in Younger versus Older Adults: Neural Correlates of  
589 Motor Familiarity. *PLoS ONE*, 8(5), e64195. doi:10.1371/journal.pone.0064195
- 590 Flach, R., Knoblich, G., & Prinz, W. (2003). Off-line authorship effects in action perception.  
591 *Brain and Cognition*, 53(3), 503–513. doi:10.1016/S0278-2626(03)00211-2
- 592 Gallese, V., Fadiga, L., Fogassi, L., & Rizzolatti, G. (19964). Action recognition in the  
593 premotor cortex. *Brain*, 119(2), 593–609. doi:10.1093/brain/119.2.593
- 594 Giese, M. A. & Rizzolatti, G. (20157). Neural and Computational Mechanisms of Action  
595 Processing: Interaction between Visual and Motor Representations. *Neuron*, 88(1),  
596 167–180. doi:10.1016/j.neuron.2015.09.040
- 597 Golnaraghi, M. (2010). *Automatic control systems* (9th ed.). Hoboken NJ: Wiley.
- 598 Grush, R. (1997). The architecture of representation. *Philosophical Psychology*, 10(1), 5–23.  
599 doi:10.1080/09515089708573201
- 600 Grush, R. (20041). The emulation theory of representation: Motor control, imagery, and  
601 perception. *Behavioral and Brain Sciences*, 27(03). doi:10.1017/S0140525X04000093

- 602 Hadley, L. V., Novembre, G., Keller, P. E., & Pickering, M. J. (201516). Causal Role of Motor  
603 Simulation in Turn-Taking Behavior. *The Journal of Neuroscience*, 35(50),  
604 16516–16520. doi:10.1523/JNEUROSCI.1850-15.2015
- 605 Ikegami, T. & Ganesh, G. (201411). Watching novice action degrades expert motor  
606 performance: Causation between action production and outcome prediction of observed  
607 actions by humans. *Scientific Reports*, 4, 6989. doi:10.1038/srep06989
- 608 Isaacs, L. D. & Finch, A. E. (1983). Anticipatory timing of beginning and intermediate tennis  
609 players. *Perceptual and Motor Skills*, 57(2), 451–454. doi:10.2466/pms.1983.57.2.451
- 610 Keller, P. E. (20121). Mental imagery in music performance: underlying mechanisms and  
611 potential benefits. *Annals of the New York Academy of Sciences*, 1252(1), 206–213.  
612 doi:10.1111/j.1749-6632.2011.06439.x
- 613 Keller, P. E., Knoblich, G., & Repp, B. (2007). Pianists duet better when they play with  
614 themselves: On the possible role of action simulation in synchronization. *Consciousness  
615 and Cognition*, 16(1), 102–111. doi:10.1016/j.concog.2005.12.004
- 616 Kilner, J. M., Friston, K. J., & Frith, C. D. (20071). Predictive coding: an account of the mirror  
617 neuron system. *Cognitive Processing*, 8(3), 159–166. doi:10.1007/s10339-007-0170-2
- 618 Knoblich, G., Butterfill, S., & Sebanz, N. (2011). Psychological Research on Joint Action:  
619 Theory and Data. In Brian H. Ross (Ed.), *Psychology of Learning and Motivation*  
620 (Vol. Volume 54, pp. 59–101). Advances in Research and Theory. San Diego: Academic  
621 Press.
- 622 Kruschke, J. K. (2013). Bayesian estimation supersedes the t test. *Journal of Experimental  
623 Psychology: General*, 142(2), 573–603. doi:10.1037/a0029146
- 624 Mann, D. L., Abernethy, B., & Farrow, D. (2010). Action specificity increases anticipatory  
625 performance and the expert advantage in natural interceptive tasks. *Acta Psychologica*,  
626 135(1), 17–23. doi:10.1016/j.actpsy.2010.04.006
- 627 Mulligan, D. & Hodges, N. J. (201312). Throwing in the dark: improved prediction of action  
628 outcomes following motor training without vision of the action. *Psychological  
629 Research*, 78(5), 692–704. doi:10.1007/s00426-013-0526-4

- 630 Novembre, G., Ticini, L. F., Schütz-Bosbach, S., & Keller, P. E. (20148). Motor simulation  
631 and the coordination of self and other in real-time joint action. *Social Cognitive and*  
632 *Affective Neuroscience*, 9(8), 1062–1068. doi:10.1093/scan/nst086
- 633 Oldfield, R. (1971). The assessment and analysis of handedness: The Edinburgh inventory.  
634 *Neuropsychologia*, 9(1), 97–113. doi:10.1016/0028-3932(71)90067-4
- 635 Olejnik, S. & Algina, J. (2003). Generalized Eta and Omega Squared Statistics: Measures of  
636 Effect Size for Some Common Research Designs. *Psychological Methods*, 8(4),  
637 434–447. doi:10.1037/1082-989X.8.4.434
- 638 Rizzolatti, G., Fadiga, L., Gallese, V., & Fogassi, L. (1996). Premotor cortex and the  
639 recognition of motor actions. *Cognitive Brain Research*, 3(2), 131–141.  
640 doi:10.1016/0926-6410(95)00038-0
- 641 Sartori, L. & Betti, S. (20151). Complementary actions. *Frontiers in Psychology*, 6.  
642 doi:10.3389/fpsyg.2015.00557
- 643 Schubotz, R. I. (2007). Prediction of external events with our motor system: towards a new  
644 framework. *Trends in Cognitive Sciences*, 11(5), 211–218.  
645 doi:10.1016/j.tics.2007.02.006
- 646 Schubotz, R. I., Sakreida, K., Tittgemeyer, M., & von Cramon, D. Y. (2004). Motor Areas  
647 Beyond Motor Performance: Deficits in Serial Prediction Following Ventrolateral  
648 Premotor Lesions. *Neuropsychology*, 18(4), 638–645. doi:10.1037/0894-4105.18.4.638
- 649 Schubotz, R. I. & von Cramon, D. Y. (200416). Sequences of abstract nonbiological stimuli  
650 share ventral premotor cortex with action observation and imagery. *The Journal of*  
651 *Neuroscience: The Official Journal of the Society for Neuroscience*, 24(24), 5467–5474.  
652 doi:10.1523/JNEUROSCI.1169-04.2004
- 653 Sebanz, N. & Shiffrar, M. (20091). Detecting deception in a bluffing body: The role of  
654 expertise. *Psychonomic Bulletin & Review*, 16(1), 170–175. doi:10.3758/PBR.16.1.170
- 655 Vesper, C., Butterfill, S., Knoblich, G., & Sebanz, N. (2010). A minimal architecture for joint  
656 action. *Neural Networks*, 23(8-9), 998–1003. doi:10.1016/j.neunet.2010.06.002
- 657 Wilson, M. & Knoblich, G. (2005). The case for motor involvement in perceiving conspecifics.  
658 *Psychological Bulletin*, 131(3), 460–473. doi:10.1037/0033-2909.131.3.460

- 659 Wolpert, D. M. (1997). Computational approaches to motor control. *Trends in Cognitive*  
660 *Sciences*, 1(6), 209–216. doi:10.1016/S1364-6613(97)01070-X
- 661 Wolpert, D. M., Doya, K., & Kawato, M. (200329). A unifying computational framework for  
662 motor control and social interaction. *Philosophical Transactions of the Royal Society of*  
663 *London. Series B: Biological Sciences*, 358(1431), 593–602.  
664 doi:10.1098/rstb.2002.1238
- 665 Wolpert, D. M. & Kawato, M. (1998). Multiple paired forward and inverse models for motor  
666 control. *Neural Networks*, 11(7-8), 1317–1329. doi:10.1016/S0893-6080(98)00066-5
- 667 Wolpert, D. M., Miall, R. C., & Kawato, M. (19981). Internal models in the cerebellum.  
668 *Trends in Cognitive Sciences*, 2(9), 338–347. doi:10.1016/S1364-6613(98)01221-2
